# Supplementary material
Source: bioRxiv or medRxiv preprint supplement (http://medrxiv.stage.highwire.org/highwire/filestream/75942/field_highwire_adjunct_files/0/2020.04.07.20056887-1.pdf)
Supplement: Supplementary file [file 2020.04.07.20056887-1.pdf]

Figure S1

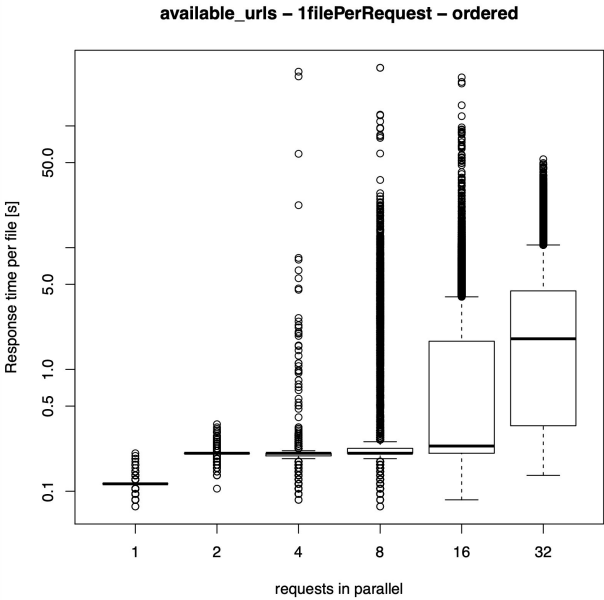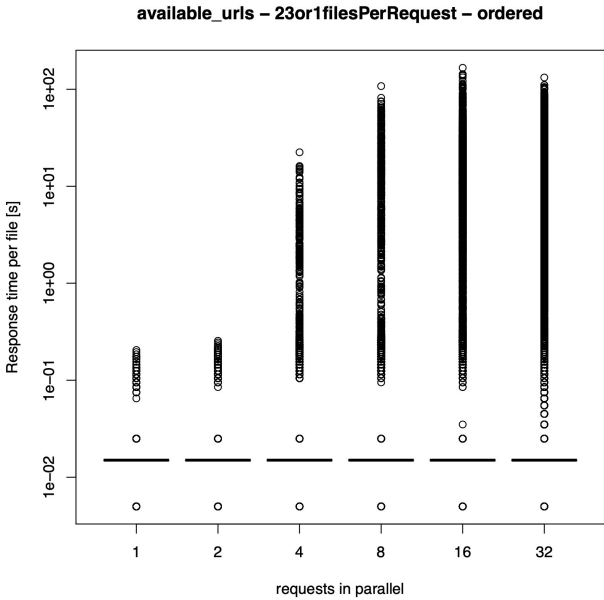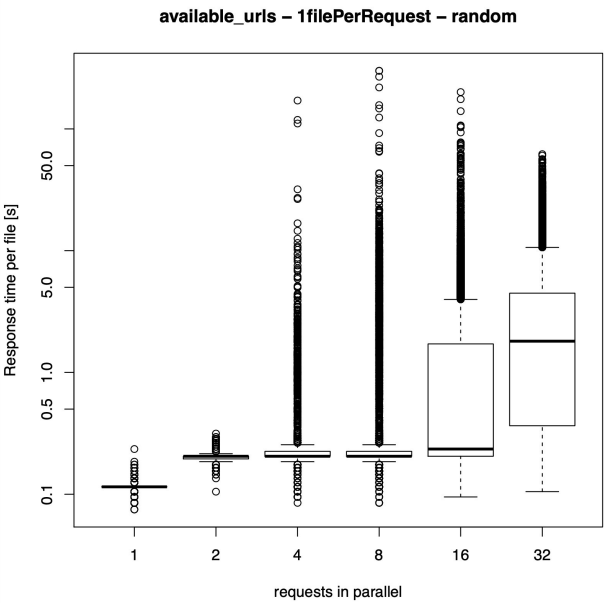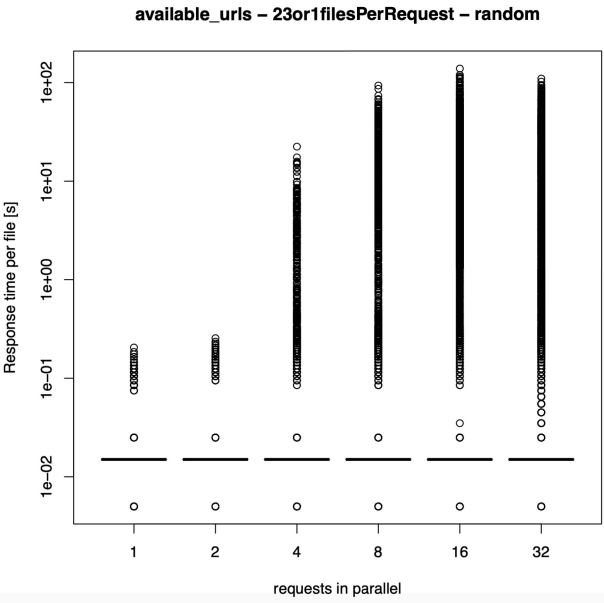

Figure S2

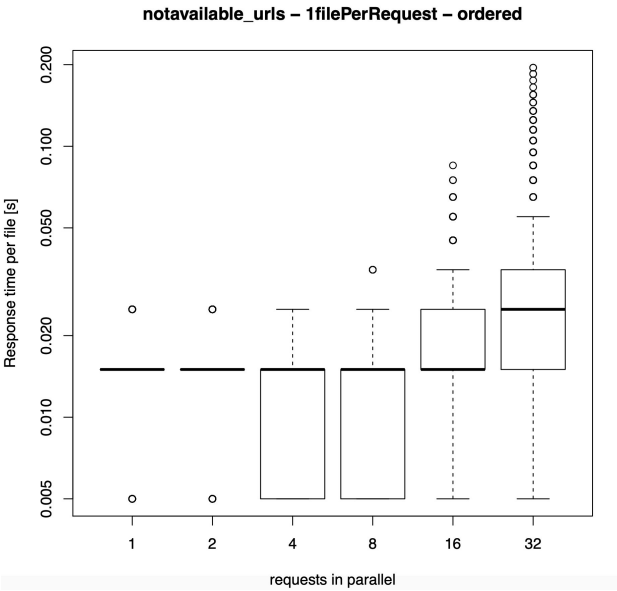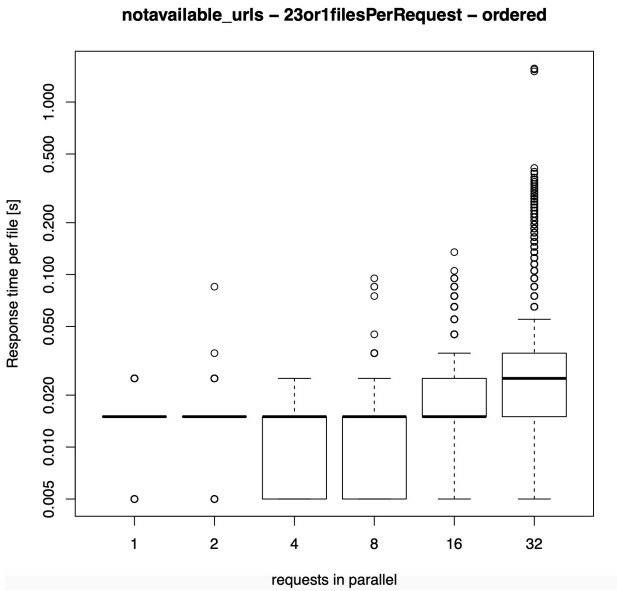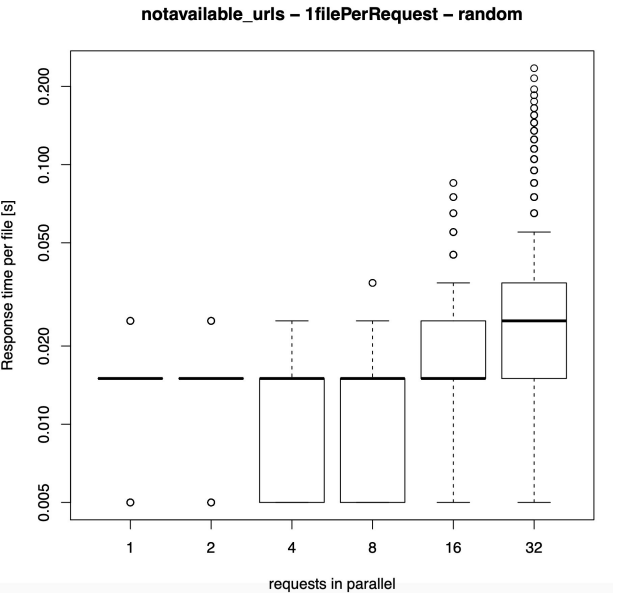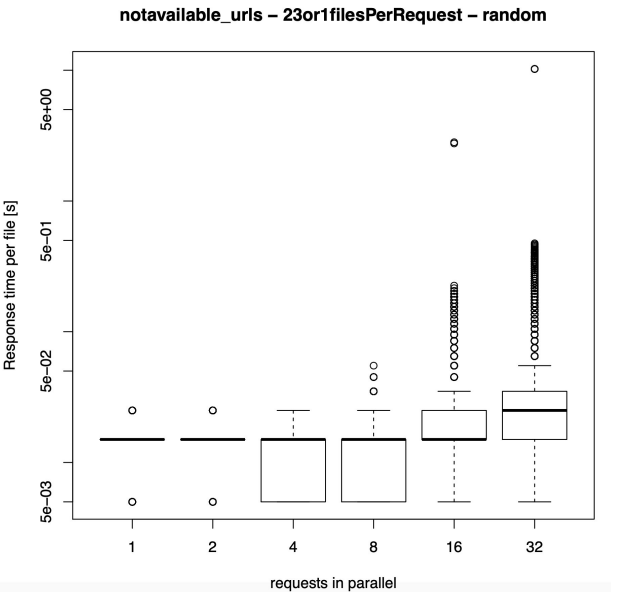

Figure S3

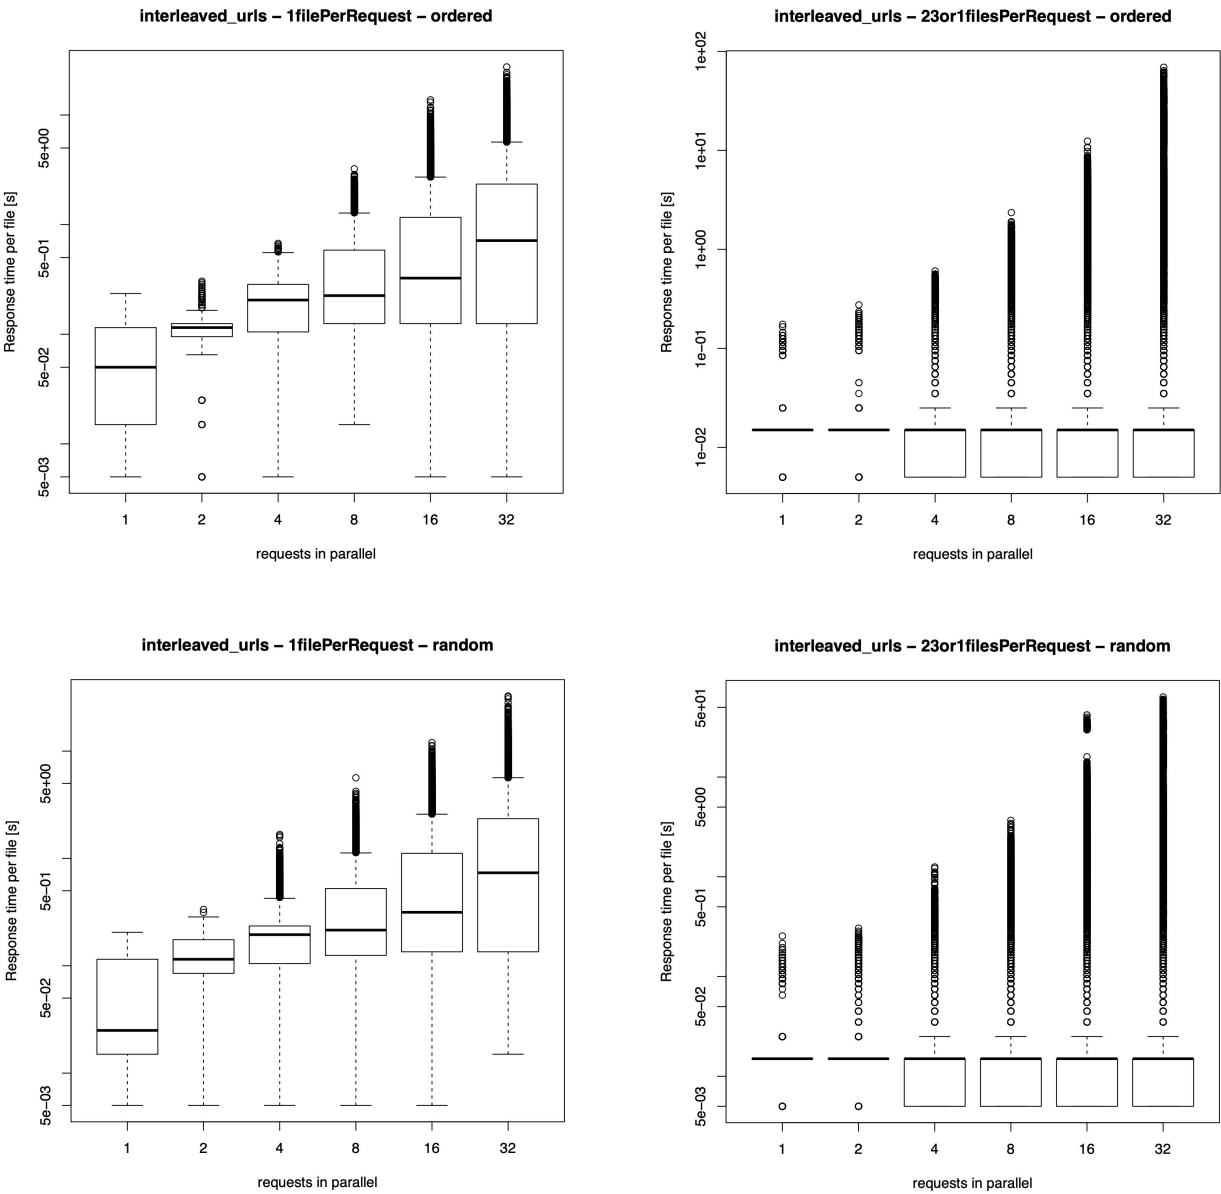

Figure S4

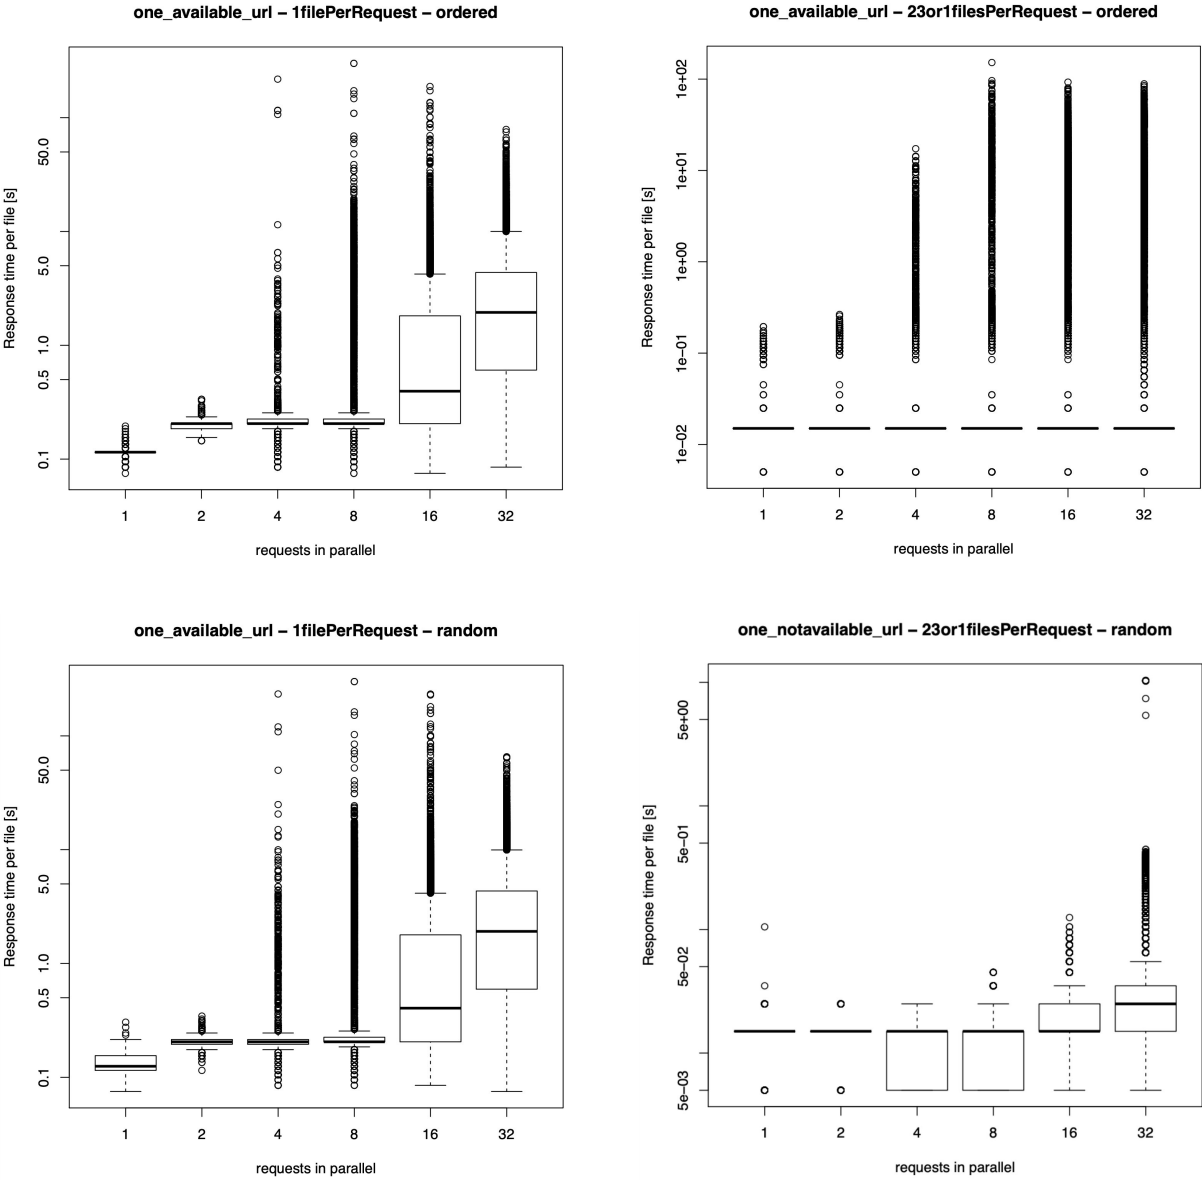



Figure S5

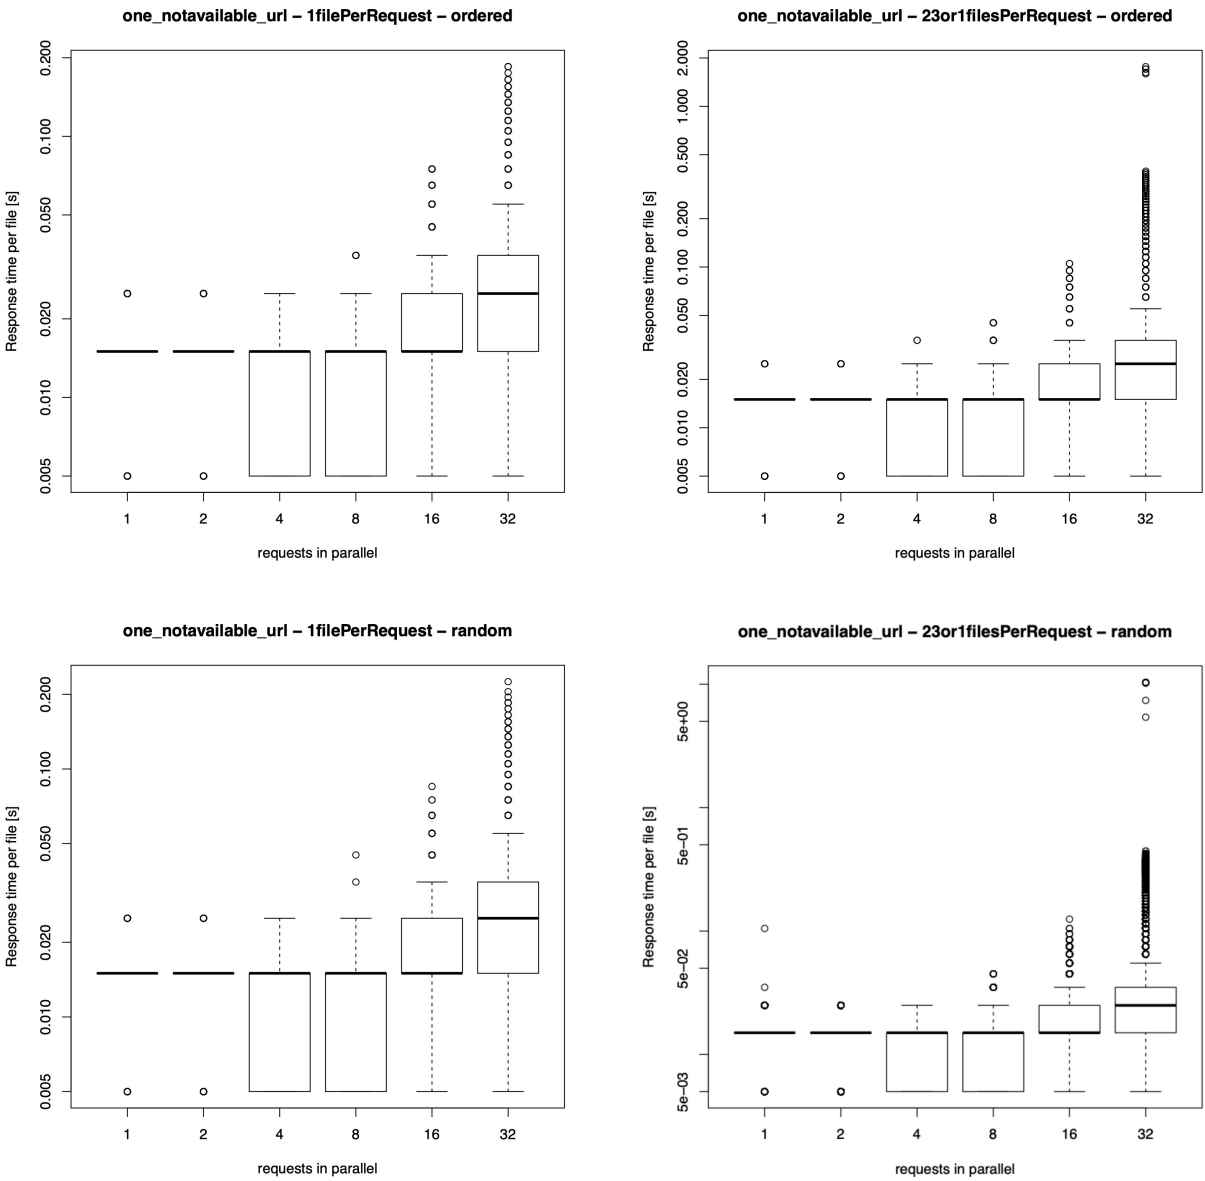

The figure consists of four subplots arranged in a 2x2 grid, each showing the distribution of response time per file [s] for different numbers of requests in parallel (1, 2, 4, 8, 16, 32). The y-axis is logarithmic, ranging from 5e-03 to 5e+00 seconds. The x-axis is labeled 'requests in parallel'.

- Top Left: two\_interleaved\_urls - 1filePerRequest - ordered**
  - Shows box plots for 1, 2, 4, 8, 16, and 32 requests in parallel.
  - Median response time increases from approximately 0.01s at 1 request to about 0.1s at 32 requests.
  - Outliers are present for 2, 4, 8, 16, and 32 requests.
- Top Right: two\_interleaved\_urls - 23or1filesPerRequest - ordered**
  - Shows box plots for 1, 2, 4, 8, 16, and 32 requests in parallel.
  - Median response time is very low (around 0.001s) for 1 and 2 requests, then increases significantly for 4 and above.
  - Outliers are present for 2, 4, 8, 16, and 32 requests.
- Bottom Left: two\_interleaved\_urls - 1filePerRequest - random**
  - Shows box plots for 1, 2, 4, 8, 16, and 32 requests in parallel.
  - Median response time increases from approximately 0.01s at 1 request to about 0.1s at 32 requests.
  - Outliers are present for 1, 2, 4, 8, 16, and 32 requests.
- Bottom Right: two\_interleaved\_urls - 23or1filesPerRequest - random**
  - Shows box plots for 1, 2, 4, 8, 16, and 32 requests in parallel.
  - Median response time is very low (around 0.001s) for 1 and 2 requests, then increases significantly for 4 and above.
  - Outliers are present for 1, 2, 4, 8, 16, and 32 requests.
